# Supplementary material for: The Spanish version of the Fatigue Assessment Scale: reliability and validity assessment in postpartum women
Source: PubMed Central journal article supplement (PMC5622603; doi:10.7717/peerj.3832), 2017-09-27
Supplement: peerj-05-3832-s001.pdf [file peerj-05-3832-s001.pdf]

FATIGUE ASSESMENT SCALE – English translation of the Spanish Version (FAS-e)

Authors: Cano-Climent, Antoni; Oliver-Roig, Antonio Cabrero-García, Julio; De Viers, Jolanda; Richart-Martínez, Miguel.

Instructions:

The next ten sentences are about how you usually feel. For each one of them mark one of the five possible answers.

1. I am worried about fatigue.

1. Never      2. Sometimes      3. Normally      4. Very often      5. Always

2. I get tired very quickly.

1. Never      2. Sometimes      3. Normally      4. Very often      5. Always

3. I don't do much during the day.

1. Never      2. Sometimes      3. Normally      4. Very often      5. Always

4. I have enough energy for everyday life.

1. Never      2. Sometimes      3. Normally      4. Very often      5. Always

5. Physically, I feel exhausted.

1. Never      2. Sometimes      3. Normally      4. Very often      5. Always

6. I have problems starting things.

1. Never      2. Sometimes      3. Normally      4. Very often      5. Always

7. I have problems thinking clearly.

1. Never      2. Sometimes      3. Normally      4. Very often      5. Always

8. I feel no desire to do anything.

1. Never      2. Sometimes      3. Normally      4. Very often      5. Always

9. Mentally, I feel exhausted.

1. Never      2. Sometimes      3. Normally      4. Very often      5. Always

10. When I am doing something, I can concentrate quite well.

1. Never      2. Sometimes      3. Normally      4. Very often      5. Always

## FATIGUE ASSESMENT SCALE – Spanish Version (FAS-e)

Authors: Cano-Climent, Antoni; Oliver-Roig, Antonio Cabrero-García, Julio; De Viers, Jolanda; Richart-Martínez, Miguel.

Instrucciones:

Las siguientes diez frases se refieren a cómo te sientes habitualmente. Para cada una de ellas marca una de las cinco posibles respuestas.

1. Estoy preocupada/o por la fatiga

1. Nunca      2. A veces      3. Normalmente      4. Muy a menudo      5. Siempre

2. Me canso muy rápidamente

1. Nunca      2. A veces      3. Normalmente      4. Muy a menudo      5. Siempre

3. No hago mucho durante el día.

1. Nunca      2. A veces      3. Normalmente      4. Muy a menudo      5. Siempre

4. Tengo bastante energía para el día a día

1. Nunca      2. A veces      3. Normalmente      4. Muy a menudo      5. Siempre

5. Físicamente, me siento agotada/o.

1. Nunca      2. A veces      3. Normalmente      4. Muy a menudo      5. Siempre

6. Tengo problemas para empezar cosas

1. Nunca      2. A veces      3. Normalmente      4. Muy a menudo      5. Siempre

7. Tengo problemas para pensar claramente

1. Nunca      2. A veces      3. Normalmente      4. Muy a menudo      5. Siempre

8. No tengo ganas de hacer nada

1. Nunca      2. A veces      3. Normalmente      4. Muy a menudo      5. Siempre

9. Mentalmente, me siento agotada/o

1. Nunca      2. A veces      3. Normalmente      4. Muy a menudo      5. Siempre

10. Cuando hago algo, puedo concentrarme bastante bien

1. Nunca      2. A veces      3. Normalmente      4. Muy a menudo      5. Siempre
